# Supplementary material for: Multidirectional Characterization of Phytochemical Profile and Health-Promoting Effects of Ziziphora bungeana Juz. Extracts
Source: MDPI journal article supplement (doi:10.3390/molecules27248994), 2022-12-16
Supplement: s1 [file s1]

## SUPPLEMENTARY FILE

**Figure S1.** Fingerprints of the analyzed extracts in the negative ionization mode.

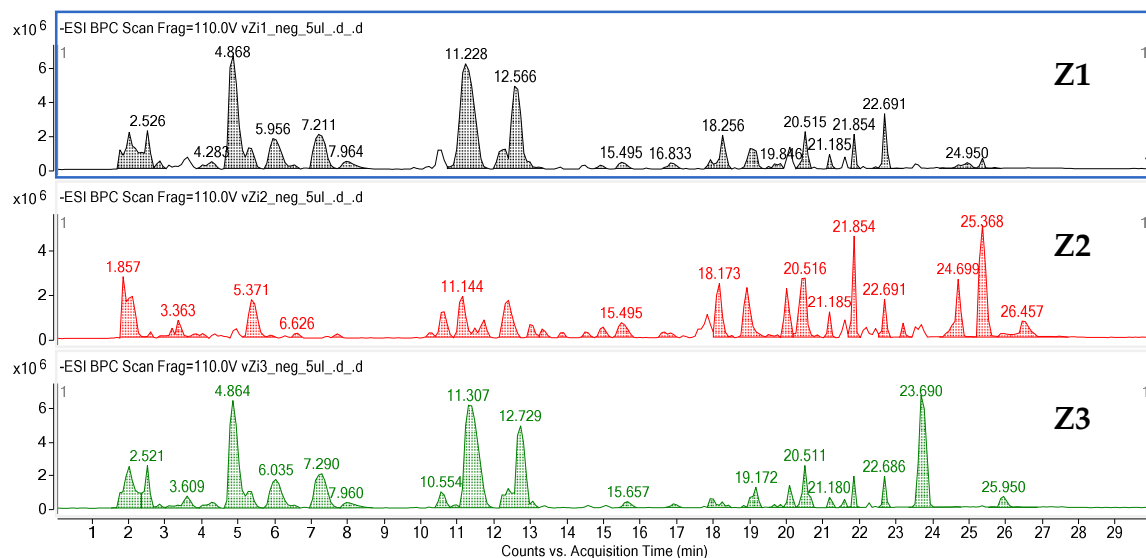

**Figure S2.** Fingerprints of the analyzed extracts in the positive ionization modes.

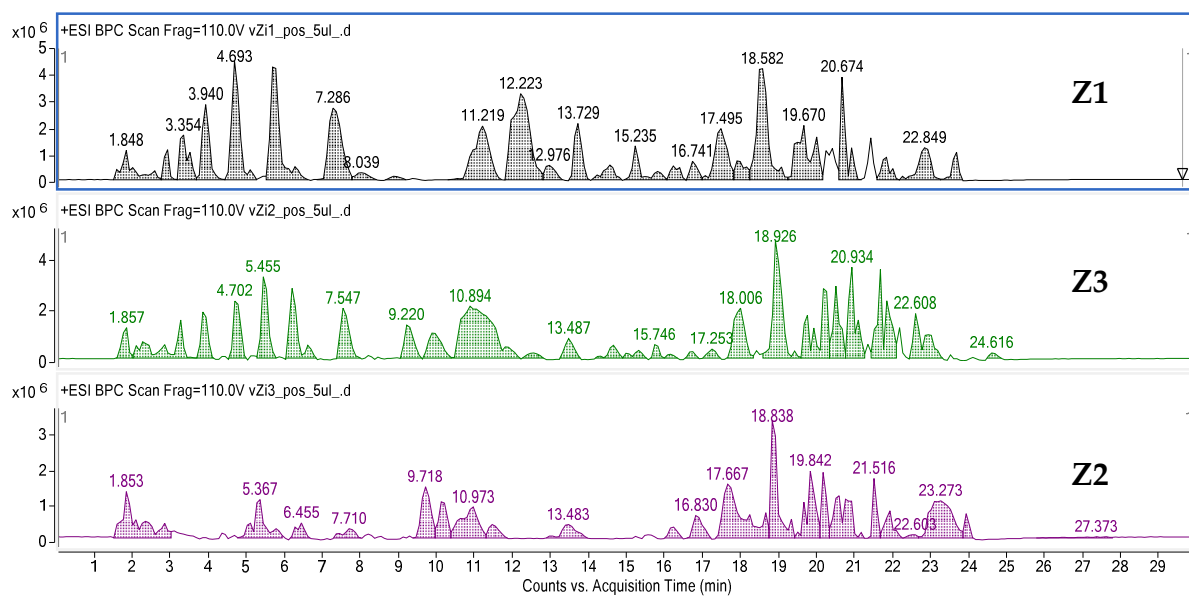

**Table S1.** MS/MS spectra of the identified compounds.

| Compound             | Spectrum                                                                                               |
|----------------------|--------------------------------------------------------------------------------------------------------|
| Apigenin             | <p>ESI Product Ion (rt: 21.832 min) Frag=130.0V CID@20.0 (269.0467[z=1] -&gt; **) vZi3_neg_5ul_d_d</p> |
| Chlorogenic acid     | <p>ESI Product Ion (rt: 3.128 min) Frag=120.0V CID@10.0 (353.0885[z=1] -&gt; **) vZi1_neg_5ul_d_d</p>  |
| Neochlorogenic acid  | <p>ESI Product Ion (rt: 3.998 min) Frag=120.0V CID@10.0 (353.0885[z=1] -&gt; **) vZi1_neg_5ul_d_d</p>  |
| (Z)-Chlorogenic acid | <p>ESI Product Ion (rt: 4.333 min) Frag=120.0V CID@10.0 (353.0885[z=1] -&gt; **) vZi1_neg_5ul_d_d</p>  |
| Luteolin             | <p>ESI Product Ion (rt: 21.302 min) Frag=130.0V CID@20.0 (285.0396[z=1] -&gt; **) vZi1_neg_5ul_d_d</p> |
| Thymonin and a dimer | <p>ESI Product Ion (rt: 19.110 min) Frag=120.0V CID@10.0 (359.0772[z=1] -&gt; **) vZi1_neg_5ul_d_d</p> |

|                                               |                                                                                                                                                                                                                                                                                                                                                                                                                                                                                    |
|-----------------------------------------------|------------------------------------------------------------------------------------------------------------------------------------------------------------------------------------------------------------------------------------------------------------------------------------------------------------------------------------------------------------------------------------------------------------------------------------------------------------------------------------|
|                                               | <p>Mass spectrum of Thymonin isomer (rt: 19.143 min). The x-axis represents mass-to-charge ratio (m/z) from 120 to 800, and the y-axis represents relative intensity from 0 to 1.2. The base peak is at m/z 359.0775. Other significant peaks are labeled at m/z 161.0246, 197.0455, and 719.1591.</p> <p>ES-Product Ion (rt: 19.143 min) Frag=120.0V CID@10.0 (719.1606[z=1] -&gt; **) vZi1_neg_5ul_d_d</p>                                                                       |
| Thymonin isomer                               | <p>Mass spectrum of Acacetin (rt: 21.820 min). The x-axis represents mass-to-charge ratio (m/z) from 110 to 450, and the y-axis represents relative intensity from 0 to 8. The base peak is at m/z 359.0772. Other significant peaks are labeled at m/z 329.0303, 344.0537, and 359.0772.</p> <p>ES-Product Ion (rt: 21.820 min) Frag=120.0V CID@10.0 (359.0772[z=1] -&gt; **) vZi1_neg_5ul_d_d</p>                                                                                |
| Acacetin                                      | <p>Mass spectrum of Diosmetin (rt: 22.719 min). The x-axis represents mass-to-charge ratio (m/z) from 90 to 380, and the y-axis represents relative intensity from 0 to 2.5. The base peak is at m/z 288.0385. Other significant peaks are labeled at m/z 240.0430, 283.0617, and 288.0385.</p> <p>ES-Product Ion (rt: 22.719 min) Frag=130.0V CID@20.0 (283.0615[z=1] -&gt; **) vZi3_neg_5ul_d_d</p>                                                                              |
| Diosmetin                                     | <p>Mass spectrum of Diosmetin (rt: 22.334 min). The x-axis represents mass-to-charge ratio (m/z) from 100 to 370, and the y-axis represents relative intensity from 0 to 4. The base peak is at m/z 284.0331. Other significant peaks are labeled at m/z 135.0459, 165.0194, 256.0349, and 299.0563.</p> <p>ES-Product Ion (rt: 22.334 min) Frag=130.0V CID@20.0 (299.0578[z=1] -&gt; **) vZi3_neg_5ul_d_d</p>                                                                     |
| Diosmetin                                     | <p>Mass spectrum of 5,7,21-trihydroxyflavone-21-O-glucopyranoside (rt: 20.059 min). The x-axis represents mass-to-charge ratio (m/z) from 100 to 1600, and the y-axis represents relative intensity from 0 to 5. The base peak is at m/z 269.0610. Other significant peaks are labeled at m/z 561.1609, 607.1661, and 269.0610.</p> <p>ES-Product Ion (rt: 20.059 min) Frag=120.0V CID@10.0 (607.1661[z=1] -&gt; **) vZi3_neg_5ul_d_d</p>                                          |
| 5,7,21-trihydroxyflavone-21-O-glucopyranoside | <p>Mass spectrum of Thymonin isomer (rt: 18.469 min). The x-axis represents mass-to-charge ratio (m/z) from 100 to 580, and the y-axis represents relative intensity from 0 to 1.6. The base peak is at m/z 269.0464. Other significant peaks are labeled at m/z 103.0055, 113.0245, 137.0248, 157.0132, 175.0283, 242.9426, 307.0822, 408.0251, 429.1333, and 445.0802.</p> <p>ES-Product Ion (rt: 18.469 min) Frag=120.0V CID@10.0 (445.0786[z=1] -&gt; **) vZi3_neg_5ul_d_d</p> |

|                             |                                                                                                                                                                |
|-----------------------------|----------------------------------------------------------------------------------------------------------------------------------------------------------------|
| Caffeic acid                | <p>x10<sup>4</sup> -ESI Product Ion (rt: 6.487 min) Frag=130.0V CID@20.0 (179.0355[z=1] -&gt; **) vZi3_neg_5ul_d_d</p> <p>Counts vs. Mass-to-Charge (m/z)</p>  |
| Ethyl ester of caffeic acid | <p>x10<sup>3</sup> -ESI Product Ion (rt: 7.642 min) Frag=120.0V CID@10.0 (207.0669[z=1] -&gt; **) vZi3_neg_5ul_d_d</p> <p>Counts vs. Mass-to-Charge (m/z)</p>  |
| Oleanolic acid              | <p>x10<sup>5</sup> -ESI Product Ion (rt: 22.920 min) Frag=130.0V CID@20.0 (455.3532[z=1] -&gt; **) vZi3_neg_5ul_d_d</p> <p>Counts vs. Mass-to-Charge (m/z)</p> |
| Ursolic acid                | <p>x10<sup>3</sup> -ESI Product Ion (rt: 24.309 min) Frag=130.0V CID@20.0 (455.3532[z=1] -&gt; **) vZi3_neg_5ul_d_d</p> <p>Counts vs. Mass-to-Charge (m/z)</p> |
| Maslinic acid               | <p>x10<sup>4</sup> -ESI Product Ion (rt: 23.338 min) Frag=130.0V CID@20.0 (471.3478[z=1] -&gt; **) vZi3_neg_5ul_d_d</p> <p>Counts vs. Mass-to-Charge (m/z)</p> |
| Thymol                      | <p>x10<sup>4</sup> +ESI Product Ion (rt: 22.674 min) Frag=130.0V CID@20.0 (151.1127[z=1] -&gt; **) vZi2_pos_5ul_d</p> <p>Counts vs. Mass-to-Charge (m/z)</p>   |

| Carvacrol          | <p>+ESI Product Ion (rt: 19.859 min) Frag=120.0V CID@10.0 (151.1124[z=1] -&gt; **) vZi3_pos_5ul_d</p> <table border="1"><thead><tr><th>m/z</th><th>Relative Intensity (x10<sup>-4</sup>)</th></tr></thead><tbody><tr><td>105.0703</td><td>~0.8</td></tr><tr><td>109.0649</td><td>~1.2</td></tr><tr><td>123.1163</td><td>~1.0</td></tr><tr><td>133.1000</td><td>~0.5</td></tr><tr><td>151.1131</td><td>2.5</td></tr><tr><td>153.1288</td><td>~0.5</td></tr></tbody></table> | m/z | Relative Intensity (x10 <sup>-4</sup> ) | 105.0703 | ~0.8 | 109.0649 | ~1.2 | 123.1163 | ~1.0 | 133.1000 | ~0.5 | 151.1131 | 2.5 | 153.1288 | ~0.5 |
|--------------------|----------------------------------------------------------------------------------------------------------------------------------------------------------------------------------------------------------------------------------------------------------------------------------------------------------------------------------------------------------------------------------------------------------------------------------------------------------------------------|-----|-----------------------------------------|----------|------|----------|------|----------|------|----------|------|----------|-----|----------|------|
| m/z                | Relative Intensity (x10 <sup>-4</sup> )                                                                                                                                                                                                                                                                                                                                                                                                                                    |     |                                         |          |      |          |      |          |      |          |      |          |     |          |      |
| 105.0703           | ~0.8                                                                                                                                                                                                                                                                                                                                                                                                                                                                       |     |                                         |          |      |          |      |          |      |          |      |          |     |          |      |
| 109.0649           | ~1.2                                                                                                                                                                                                                                                                                                                                                                                                                                                                       |     |                                         |          |      |          |      |          |      |          |      |          |     |          |      |
| 123.1163           | ~1.0                                                                                                                                                                                                                                                                                                                                                                                                                                                                       |     |                                         |          |      |          |      |          |      |          |      |          |     |          |      |
| 133.1000           | ~0.5                                                                                                                                                                                                                                                                                                                                                                                                                                                                       |     |                                         |          |      |          |      |          |      |          |      |          |     |          |      |
| 151.1131           | 2.5                                                                                                                                                                                                                                                                                                                                                                                                                                                                        |     |                                         |          |      |          |      |          |      |          |      |          |     |          |      |
| 153.1288           | ~0.5                                                                                                                                                                                                                                                                                                                                                                                                                                                                       |     |                                         |          |      |          |      |          |      |          |      |          |     |          |      |
| Ziziphoroside A    | <p>+ESI Product Ion (rt: 10.500 min) Frag=130.0V CID@20.0 (353.1603[z=1] -&gt; **) vZi3_pos_5ul_d</p> <table border="1"><thead><tr><th>m/z</th><th>Relative Intensity (x10<sup>-4</sup>)</th></tr></thead><tbody><tr><td>201.0403</td><td>~1.5</td></tr><tr><td>353.1593</td><td>5.0</td></tr></tbody></table>                                                                                                                                                             | m/z | Relative Intensity (x10 <sup>-4</sup> ) | 201.0403 | ~1.5 | 353.1593 | 5.0  |          |      |          |      |          |     |          |      |
| m/z                | Relative Intensity (x10 <sup>-4</sup> )                                                                                                                                                                                                                                                                                                                                                                                                                                    |     |                                         |          |      |          |      |          |      |          |      |          |     |          |      |
| 201.0403           | ~1.5                                                                                                                                                                                                                                                                                                                                                                                                                                                                       |     |                                         |          |      |          |      |          |      |          |      |          |     |          |      |
| 353.1593           | 5.0                                                                                                                                                                                                                                                                                                                                                                                                                                                                        |     |                                         |          |      |          |      |          |      |          |      |          |     |          |      |
| Ziziphoroside B    | <p>+ESI Product Ion (rt: 12.876 min) Frag=130.0V CID@20.0 (353.1603[z=1] -&gt; **) vZi1_pos_5ul_d</p> <table border="1"><thead><tr><th>m/z</th><th>Relative Intensity (x10<sup>-5</sup>)</th></tr></thead><tbody><tr><td>119.0484</td><td>~0.5</td></tr><tr><td>147.0446</td><td>~0.8</td></tr><tr><td>201.0401</td><td>~0.5</td></tr><tr><td>353.1605</td><td>2.0</td></tr></tbody></table>                                                                               | m/z | Relative Intensity (x10 <sup>-5</sup> ) | 119.0484 | ~0.5 | 147.0446 | ~0.8 | 201.0401 | ~0.5 | 353.1605 | 2.0  |          |     |          |      |
| m/z                | Relative Intensity (x10 <sup>-5</sup> )                                                                                                                                                                                                                                                                                                                                                                                                                                    |     |                                         |          |      |          |      |          |      |          |      |          |     |          |      |
| 119.0484           | ~0.5                                                                                                                                                                                                                                                                                                                                                                                                                                                                       |     |                                         |          |      |          |      |          |      |          |      |          |     |          |      |
| 147.0446           | ~0.8                                                                                                                                                                                                                                                                                                                                                                                                                                                                       |     |                                         |          |      |          |      |          |      |          |      |          |     |          |      |
| 201.0401           | ~0.5                                                                                                                                                                                                                                                                                                                                                                                                                                                                       |     |                                         |          |      |          |      |          |      |          |      |          |     |          |      |
| 353.1605           | 2.0                                                                                                                                                                                                                                                                                                                                                                                                                                                                        |     |                                         |          |      |          |      |          |      |          |      |          |     |          |      |
| Ziziphoroside C    | <p>+ESI Product Ion (rt: 13.528 min) Frag=120.0V CID@10.0 (353.1603[z=1] -&gt; **) vZi1_pos_5ul_d</p> <table border="1"><thead><tr><th>m/z</th><th>Relative Intensity (x10<sup>-4</sup>)</th></tr></thead><tbody><tr><td>147.0430</td><td>~0.8</td></tr><tr><td>165.0558</td><td>~0.5</td></tr><tr><td>201.0388</td><td>~0.8</td></tr><tr><td>353.1601</td><td>3.5</td></tr></tbody></table>                                                                               | m/z | Relative Intensity (x10 <sup>-4</sup> ) | 147.0430 | ~0.8 | 165.0558 | ~0.5 | 201.0388 | ~0.8 | 353.1601 | 3.5  |          |     |          |      |
| m/z                | Relative Intensity (x10 <sup>-4</sup> )                                                                                                                                                                                                                                                                                                                                                                                                                                    |     |                                         |          |      |          |      |          |      |          |      |          |     |          |      |
| 147.0430           | ~0.8                                                                                                                                                                                                                                                                                                                                                                                                                                                                       |     |                                         |          |      |          |      |          |      |          |      |          |     |          |      |
| 165.0558           | ~0.5                                                                                                                                                                                                                                                                                                                                                                                                                                                                       |     |                                         |          |      |          |      |          |      |          |      |          |     |          |      |
| 201.0388           | ~0.8                                                                                                                                                                                                                                                                                                                                                                                                                                                                       |     |                                         |          |      |          |      |          |      |          |      |          |     |          |      |
| 353.1601           | 3.5                                                                                                                                                                                                                                                                                                                                                                                                                                                                        |     |                                         |          |      |          |      |          |      |          |      |          |     |          |      |
| Schizonepetaside E | <p>+ESI Product Ion (rt: 3.961 min) Frag=120.0V CID@10.0 (349.1844[z=1] -&gt; **) vZi3_pos_5ul_d</p> <table border="1"><thead><tr><th>m/z</th><th>Relative Intensity (x10<sup>-4</sup>)</th></tr></thead><tbody><tr><td>163.0416</td><td>~0.8</td></tr><tr><td>281.0342</td><td>~0.5</td></tr><tr><td>349.1849</td><td>3.5</td></tr></tbody></table>                                                                                                                       | m/z | Relative Intensity (x10 <sup>-4</sup> ) | 163.0416 | ~0.8 | 281.0342 | ~0.5 | 349.1849 | 3.5  |          |      |          |     |          |      |
| m/z                | Relative Intensity (x10 <sup>-4</sup> )                                                                                                                                                                                                                                                                                                                                                                                                                                    |     |                                         |          |      |          |      |          |      |          |      |          |     |          |      |
| 163.0416           | ~0.8                                                                                                                                                                                                                                                                                                                                                                                                                                                                       |     |                                         |          |      |          |      |          |      |          |      |          |     |          |      |
| 281.0342           | ~0.5                                                                                                                                                                                                                                                                                                                                                                                                                                                                       |     |                                         |          |      |          |      |          |      |          |      |          |     |          |      |
| 349.1849           | 3.5                                                                                                                                                                                                                                                                                                                                                                                                                                                                        |     |                                         |          |      |          |      |          |      |          |      |          |     |          |      |

**Table S2.** The relative compositions of the Z1–Z3 extracts. For the each studied compound (1–26), the HPLC peak areas representing the absolute amounts of a given compound within Z1, Z2 and Z3 extracts were rescaled, in order to sum to 1 in every row of the table below, expressing the relative compositions of the Z1–Z3 extracts.

|    |                        | Absolute Compositions |          |          | Relative Compositions<br>(C <sub>rel</sub> ) |        |        |
|----|------------------------|-----------------------|----------|----------|----------------------------------------------|--------|--------|
|    |                        | Z1                    | Z2       | Z3       | Z1                                           | Z2     | Z3     |
| 1  | Chlorogenic acid       | 1540451               | 616767   | 1428191  | 0.4296                                       | 0.1720 | 0.3983 |
| 2  | Neochlorogenic acid    | 3809788               | 1204722  | 4321964  | 0.4081                                       | 0.1290 | 0.4629 |
| 4  | (Z)-Chlorogenic acid   | 7447554               | 1204722  | 4720773  | 0.5569                                       | 0.0901 | 0.3530 |
| 6  | Caffeic acid           | 6243017               | 5526195  | 5075319  | 0.3706                                       | 0.3281 | 0.3013 |
| 9  | Ziziphoroside isomer 1 | 559519                | 362891   | 241409   | 0.4808                                       | 0.3118 | 0.2074 |
| 10 | Ziziphoroside isomer 2 | 175140                | 0        | 24764    | 0.8761                                       | 0.0000 | 0.1239 |
| 11 | Ziziphoroside isomer 3 | 344946                | 251998   | 320946   | 0.3758                                       | 0.2745 | 0.3497 |
| 13 | Rosmarinic acid        | 32458496              | 23080201 | 13968651 | 0.4670                                       | 0.3321 | 0.2010 |
| 15 | Diosmin                | 12139796              | 21723047 | 12863281 | 0.2598                                       | 0.4649 | 0.2753 |
| 23 | Acacetin               | 1838989               | 1331696  | 5276971  | 0.2177                                       | 0.1576 | 0.6247 |
| 26 | Ursolic acid           | 11308                 | 1391069  | 3039741  | 0.0025                                       | 0.3132 | 0.6843 |

**Table S3.** The relative biological activities of the Z1–Z3 extracts. Biological activities represented by ‘survivability’ of cells/enzymes (S) were taken from Figure 6 for the Z1–Z3 extracts of concentrations equal to 200 ug/mL and used to calculate biological activity (A) using formula  $A = 100\% - S$ . For each biological activity test (I–VIII), the values of A for the Z1, Z2 and Z3 extracts were rescaled in order to sum to 1 in every row of the table below.

|   |                         | A = 100%-S [%] |      |       | Relative Activities (A <sub>rel</sub> ) |        |        |
|---|-------------------------|----------------|------|-------|-----------------------------------------|--------|--------|
|   |                         | Z1             | Z2   | Z3    | Z1                                      | Z2     | Z3     |
| I | Cytotoxicity B16F10-10% | 2.02           | 4.42 | 15.31 | 0.0929                                  | 0.2032 | 0.7039 |

|             |                        |       |       |       |        |        |        |
|-------------|------------------------|-------|-------|-------|--------|--------|--------|
| <b>II</b>   | Cytotoxicity B16F10-1% | 2.22  | 6.4   | 16.95 | 0.0868 | 0.2503 | 0.6629 |
| <b>III</b>  | Cytotoxicity HaCat-10% | 0     | 26.2  | 0     | 0.0000 | 1.0000 | 0.0000 |
| <b>IV</b>   | A375-10%               | 19.31 | 28.07 | 0     | 0.4076 | 0.5924 | 0.0000 |
| <b>V</b>    | SKMEL-3                | 8.14  | 23.12 | 0     | 0.2604 | 0.7396 | 0.0000 |
| <b>VI</b>   | MurT                   | 29.93 | 49.75 | 17.4  | 0.3083 | 0.5125 | 0.1792 |
| <b>VII</b>  | MushT                  | 7.6   | 9.07  | 0     | 0.4559 | 0.5441 | 0.0000 |
| <b>VIII</b> | SOD                    | 7.41  | 36.14 | 24.88 | 0.1083 | 0.5281 | 0.3636 |
